# Supplementary material
Source: Springer Nature journal article supplement (https://www.springermedizin.de/resource/supplementary/13256_2013_3125_MOESM1_ESM.pdf/9650478)

A First  
TPCT

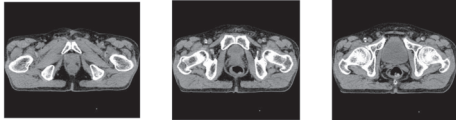

B 1 hour, second TPCT

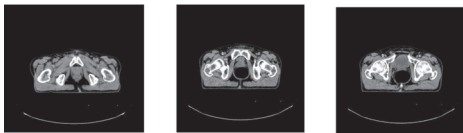

C Test scan

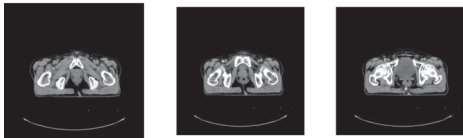

D Third TPCT

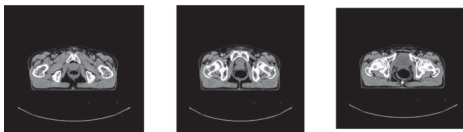

E Four days after  
AGI suspended

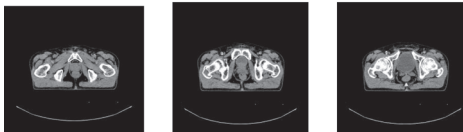

Supplement: MOESM1 [file 9650478]
